# Supplementary material for: MiR-1 suppresses tumor cell proliferation in colorectal cancer by inhibition of Smad3-mediated tumor glycolysis
Source: PubMed Central journal article supplement (PMC5520746; doi:10.1038/cddis.2017.60), 2017-05-04

**Fig.2s**

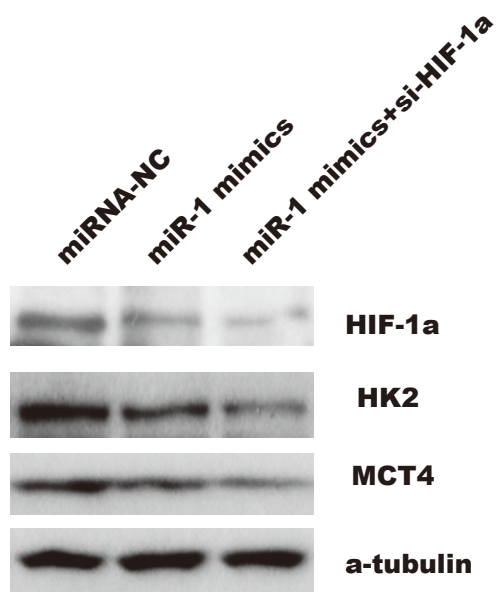

Supplement: cddis201760x2.pdf [file cddis201760x2.pdf]
