# Supplementary material for: MiR-1 suppresses tumor cell proliferation in colorectal cancer by inhibition of Smad3-mediated tumor glycolysis
Source: PubMed Central journal article supplement (PMC5520746; doi:10.1038/cddis.2017.60), 2017-05-04
Supplement: cddis201760x4.pdf [file cddis201760x4.pdf]

## **Supplementary Figure legend**

**Fig.1s Indicated genes were not targets of miR-1.** The 3'UTR of indicated genes were cloned into psicheck2 plasmid and sequenced by IGene company (China,Guangzhou), which were co-transfected into HEK293 cells with miR-NC and miR-1 mimics, respectively. 48 hours after transfection, the relative luciferase unit were performed as instruction.

**Fig.2s depletion of HIF-1a expression aggravated the miR-1 inhibition effect.** siRNA targeted HIF-1a were transfected into indicated stable HT-29 cell, 60 hours after transfection, the whole cell lysis were harvested and performed to detect indicated proteins by western blotting.

**Fig.3s SB431542 treatment decreased phosphorylation of Smad3 rather than dissociation Smad3 from HIF-1a.** Indicated group from HT-29 were grown to 70–80% confluence and serum starved for 24 hours, then stimulated for another 1 hour, the whole cell lysates were immunoprecipitated with anti-Smad3 antibodies, western blotting were performed to analyze the change of HIF-1a expression.
