# Supplementary material for: MiR-1 suppresses tumor cell proliferation in colorectal cancer by inhibition of Smad3-mediated tumor glycolysis
Source: PubMed Central journal article supplement (PMC5520746; doi:10.1038/cddis.2017.60), 2017-05-04
Supplement: cddis201760x5.pdf [file cddis201760x5.pdf]

## Supplementary Materials

**Table S1**

### 1. Real-time primer:

| Genes          | QPCR Forward primer        | QPCR Reverse primer        |
|----------------|----------------------------|----------------------------|
| HK2            | 5'-ACCTTTGTGAGGTCCACTCC-3' | 5'-TGTCCGTTACTTTACCCAA-3'  |
| SLC16A4        | 5'-GGGCTTTCGTTGTTACTGGT-3' | 5'-GGTAGTTACCACAGCAGCCA-3' |
| HIF-1 $\alpha$ | 5'-AAGGTATTGCACTGCACAGG-3' | 5'-AATGGGTTCACAAATCAGCA-3' |

### 2. ChIP primer:

| Genes          | ChIP Forward primer        | ChIP Reverse primer        |
|----------------|----------------------------|----------------------------|
| HK2            | 5'-CATGCGTCAGGCACCATTTT-3' | 5'-GTCTGGTCCCGAGTCTTAGC-3' |
| SLC16A4        | 5'-GGGGAGTGTGGGCCATTATT-3' | 5'-CACCATCGTCTGTCCTCACC-3' |
| HIF-1 $\alpha$ | 5'-GGTCACTTCTCCACCTAAT-3'  | 5'-CAGGCTCACGCTACGGAATC-3' |
